# Supplementary material for: Mitochondrial DNA copy number in peripheral blood leukocytes and the aggressiveness of localized prostate cancer
Source: PubMed Central journal article supplement (PMC4747203; doi:10.18632/oncotarget.5889), 2015-10-26
Supplement: oncotarget-06-41988-s001.pdf [file oncotarget-06-41988-s001.pdf]

## SUPPLEMENTARY TABLES

**Supplementary Table S1: mtDNAcn in peripheral blood leukocytes and aggressiveness of prostate cancer by age, BMI and smoking status**

| mtDNAcn                                         | Low-risk form of PCa N (%) | Intermediate-risk form of PCa |                  |                | High-risk form of PCa |                  |                | <i>P</i> for interaction |
|-------------------------------------------------|----------------------------|-------------------------------|------------------|----------------|-----------------------|------------------|----------------|--------------------------|
|                                                 |                            | <i>N</i> (%)                  | OR (95% CI)      | <i>P</i> value | <i>N</i> (%)          | OR (95% CI)      | <i>P</i> value |                          |
| <b>Stratified by age<sup>a</sup></b>            |                            |                               |                  |                |                       |                  |                |                          |
| Age <60 years                                   |                            |                               |                  |                |                       |                  |                | 0.98                     |
| 3 <sup>rd</sup> tertile                         | 119 (42.8)                 | 130 (40.0)                    | Reference        | N/A            | 27 (27.8)             | Reference        | N/A            |                          |
| 2 <sup>nd</sup> tertile                         | 102 (36.7)                 | 109 (33.5)                    | 0.92 (0.61–1.41) | 0.71           | 44 (45.4)             | 1.49 (0.80–2.79) | 0.21           |                          |
| 1 <sup>st</sup> tertile                         | 57 (20.5)                  | 86 (26.5)                     | 1.09 (0.68–1.74) | 0.73           | 26 (26.8)             | 1.58 (0.79–3.19) | 0.20           |                          |
| Age ≥60 years                                   |                            |                               |                  |                |                       |                  |                |                          |
| 3 <sup>rd</sup> tertile                         | 95 (30.5)                  | 155 (30.7)                    | Reference        | N/A            | 57 (24.3)             | Reference        | N/A            |                          |
| 2 <sup>nd</sup> tertile                         | 99 (31.8)                  | 160 (31.7)                    | 0.87 (0.57–1.31) | 0.50           | 70 (29.8)             | 1.28 (0.76–2.18) | 0.35           |                          |
| 1 <sup>st</sup> tertile                         | 117 (37.6)                 | 190 (37.6)                    | 1.00 (0.67–1.49) | 0.99           | 108 (46.0)            | 1.52 (0.92–2.53) | 0.10           |                          |
| <b>Stratified by BMI<sup>b</sup></b>            |                            |                               |                  |                |                       |                  |                |                          |
| BMI <30 kg/m <sup>2</sup>                       |                            |                               |                  |                |                       |                  |                | 0.93                     |
| 3 <sup>rd</sup> tertile                         | 119 (35.4)                 | 162 (36.7)                    | Reference        | N/A            | 41 (27.0)             | Reference        | N/A            |                          |
| 2 <sup>nd</sup> tertile                         | 116 (34.5)                 | 135 (30.5)                    | 0.82 (0.58–1.17) | 0.28           | 52 (34.2)             | 1.14 (0.68–1.91) | 0.61           |                          |
| 1 <sup>st</sup> tertile                         | 101 (30.1)                 | 145 (32.8)                    | 1.00 (0.70–1.45) | 0.98           | 59 (38.8)             | 1.33 (0.79–2.24) | 0.28           |                          |
| BMI ≥30 kg/m <sup>2</sup>                       |                            |                               |                  |                |                       |                  |                |                          |
| 3 <sup>rd</sup> tertile                         | 51 (33.8)                  | 81 (31.9)                     | Reference        | N/A            | 25 (20.5)             | Reference        | N/A            |                          |
| 2 <sup>nd</sup> tertile                         | 52 (34.4)                  | 83 (32.7)                     | 1.05 (0.62–1.76) | 0.86           | 47 (38.5)             | 1.64 (0.85–3.15) | 0.14           |                          |
| 1 <sup>st</sup> tertile                         | 48 (31.8)                  | 90 (35.4)                     | 1.21 (0.71–2.05) | 0.48           | 50 (41.0)             | 1.88 (0.97–3.63) | 0.06           |                          |
| <b>Stratified by smoking status<sup>c</sup></b> |                            |                               |                  |                |                       |                  |                |                          |
| Never-smokers                                   |                            |                               |                  |                |                       |                  |                | 0.45                     |
| 3 <sup>rd</sup> tertile                         | 109 (38.1)                 | 144 (35.2)                    | Reference        | N/A            | 34 (27.4)             | Reference        | N/A            |                          |
| 2 <sup>nd</sup> tertile                         | 93 (32.5)                  | 113 (27.6)                    | 0.82 (0.54–1.24) | 0.35           | 40 (32.3)             | 1.26 (0.69–2.29) | 0.45           |                          |
| 1 <sup>st</sup> tertile                         | 84 (29.4)                  | 152 (37.2)                    | 1.21 (0.81–1.82) | 0.36           | 50 (40.3)             | 1.38 (0.76–2.51) | 0.28           |                          |
| Ever-smokers                                    |                            |                               |                  |                |                       |                  |                |                          |
| 3 <sup>rd</sup> tertile                         | 104 (35.1)                 | 141 (33.6)                    | Reference        | N/A            | 50 (24.3)             | Reference        | N/A            |                          |
| 2 <sup>nd</sup> tertile                         | 104 (35.1)                 | 156 (37.1)                    | 0.97 (0.66–1.44) | 0.89           | 74 (35.9)             | 1.50 (0.90–2.49) | 0.12           |                          |
| 1 <sup>st</sup> tertile                         | 88 (29.7)                  | 123 (29.3)                    | 0.88 (0.58–1.33) | 0.54           | 82 (39.8)             | 1.65 (0.98–2.77) | 0.06           |                          |

<sup>a</sup>Adjusted for BMI, smoking status and pack-year<sup>b</sup>Adjusted for age, smoking status and pack-year<sup>c</sup>Adjusted for age and BMI

Abbreviations: mtDNAcn, mitochondrial DNA copy number; PCa, prostate cancer; OR, odds ratio; CI, confidence interval; BMI, body mass index.

**Supplementary Table S2: mtDNAcn in peripheral blood leukocytes and Gleason score of prostate cancer overall and by PSA levels**

| mtDNAcn                                     | Gleason score $\leq 6$<br>N (%) | Gleason score = 7 |                                      |         | Gleason score $\geq 8$ |                                      |         |
|---------------------------------------------|---------------------------------|-------------------|--------------------------------------|---------|------------------------|--------------------------------------|---------|
|                                             |                                 | N (%)             | Adjusted OR <sup>a</sup><br>(95% CI) | P value | N (%)                  | Adjusted OR <sup>a</sup><br>(95% CI) | P value |
| <b>Overall</b>                              |                                 |                   |                                      |         |                        |                                      |         |
| 3 <sup>rd</sup> tertile                     | 232 (35.9)                      | 295 (33.5)        | Reference                            | N/A     | 56 (25.2)              | Reference                            | N/A     |
| 2 <sup>nd</sup> tertile                     | 223 (34.5)                      | 287 (32.6)        | 0.96 (0.72–1.27)                     | 0.77    | 74 (33.3)              | 1.23 (0.78–1.96)                     | 0.37    |
| 1 <sup>st</sup> tertile                     | 192 (29.7)                      | 299 (33.9)        | 1.11 (0.83–1.48)                     | 0.49    | 92 (41.4)              | 1.53 (0.97–2.43)                     | 0.07    |
| <b>Stratified by PSA levels<sup>b</sup></b> |                                 |                   |                                      |         |                        |                                      |         |
| Among those with PSA $\leq 4$ ng/ml         |                                 |                   |                                      |         |                        |                                      |         |
| 3 <sup>rd</sup> tertile                     | 96 (39.2)                       | 60 (32.6)         | Reference                            | N/A     | 6 (16.2)               | Reference                            | N/A     |
| 2 <sup>nd</sup> tertile                     | 84 (34.3)                       | 62 (33.7)         | 1.10 (0.65–1.86)                     | 0.72    | 13 (35.1)              | 3.08 (0.79–11.94)                    | 0.10    |
| 1 <sup>st</sup> tertile                     | 65 (26.5)                       | 62 (33.7)         | 1.35 (0.77–2.35)                     | 0.29    | 18 (48.6)              | 4.88 (1.30–18.39)                    | 0.02    |
| Among those with PSA $>4$ ng/ml             |                                 |                   |                                      |         |                        |                                      |         |
| 3 <sup>rd</sup> tertile                     | 136 (33.8)                      | 235 (33.7)        | Reference                            | N/A     | 50 (27.0)              | Reference                            | N/A     |
| 2 <sup>nd</sup> tertile                     | 139 (34.6)                      | 225 (32.3)        | 0.92 (0.65–1.30)                     | 0.63    | 61 (33.0)              | 1.09 (0.65–1.83)                     | 0.75    |
| 1 <sup>st</sup> tertile                     | 127 (31.6)                      | 237 (34.0)        | 1.00 (0.70–1.42)                     | 1.00    | 74 (40.0)              | 1.19 (0.71–2.00)                     | 0.51    |

<sup>a</sup>Adjusted for age, BMI, smoking status and pack-year

<sup>b</sup>P for interaction = 0.21

Abbreviations: mtDNAcn, mitochondrial DNA copy number; PSA, prostate-specific antigen; OR, odds ratio; CI, confidence interval.

**Supplementary Table S3: mtDNAcn in peripheral blood leukocytes and disease progression among localized prostate cancer patients by age, BMI, smoking status, and D'Amico risk groups**

| mtDNAcn                                             | Progression<br>N (%) | No Progression<br>N (%) | Adjusted HR<br>(95% CI) | P value | P for interaction |
|-----------------------------------------------------|----------------------|-------------------------|-------------------------|---------|-------------------|
| <b>Stratified by age<sup>a</sup></b>                |                      |                         |                         |         |                   |
| Age <60 years                                       |                      |                         |                         |         | 0.93              |
| 3 <sup>rd</sup> tertile (highest)                   | 16 (7.5)             | 196 (92.5)              | Reference               | N/A     |                   |
| 2 <sup>nd</sup> and 1 <sup>st</sup> tertile         | 39 (12.7)            | 269 (87.3)              | 1.47 (0.71–3.05)        | 0.30    |                   |
| Age ≥60 years                                       |                      |                         |                         |         |                   |
| 3 <sup>rd</sup> tertile (highest)                   | 19 (8.5)             | 205 (91.5)              | Reference               | N/A     |                   |
| 2 <sup>nd</sup> and 1 <sup>st</sup> tertile         | 64 (12.3)            | 458 (87.7)              | 1.59 (0.82–3.07)        | 0.17    |                   |
| <b>Stratified by BMI<sup>b</sup></b>                |                      |                         |                         |         |                   |
| BMI <30 kg/m <sup>2</sup>                           |                      |                         |                         |         | 0.44              |
| 3 <sup>rd</sup> tertile (highest)                   | 17 (6.9)             | 228 (93.1)              | Reference               | N/A     |                   |
| 2 <sup>nd</sup> and 1 <sup>st</sup> tertile         | 52 (12.3)            | 370 (87.7)              | 1.58 (0.87–2.84)        | 0.13    |                   |
| BMI ≥30 kg/m <sup>2</sup>                           |                      |                         |                         |         |                   |
| 3 <sup>rd</sup> tertile (highest)                   | 8 (6.8)              | 109 (93.2)              | Reference               | N/A     |                   |
| 2 <sup>nd</sup> and 1 <sup>st</sup> tertile         | 29 (10.7)            | 241 (89.3)              | 1.29 (0.53–3.13)        | 0.57    |                   |
| <b>Stratified by smoking status<sup>c</sup></b>     |                      |                         |                         |         |                   |
| Non-smokers                                         |                      |                         |                         |         | 0.54              |
| 3 <sup>rd</sup> tertile (highest)                   | 15 (6.9)             | 202 (93.1)              | Reference               | N/A     |                   |
| 2 <sup>nd</sup> and 1 <sup>st</sup> tertile         | 41 (10.9)            | 335 (89.1)              | 1.74 (0.84–3.61)        | 0.14    |                   |
| Ever smokers                                        |                      |                         |                         |         |                   |
| 3 <sup>rd</sup> tertile (highest)                   | 20 (9.1)             | 199 (90.9)              | Reference               | N/A     |                   |
| 2 <sup>nd</sup> and 1 <sup>st</sup> tertile         | 60 (13.3)            | 390 (86.7)              | 1.40 (0.77–2.56)        | 0.27    |                   |
| <b>Stratified by D'Amico risk group<sup>d</sup></b> |                      |                         |                         |         |                   |
| Low/intermediate-risk form of PCa                   |                      |                         |                         |         | 0.92              |
| 3 <sup>rd</sup> tertile (highest)                   | 21 (5.7)             | 349 (94.3)              | Reference               | N/A     |                   |
| 2 <sup>nd</sup> and 1 <sup>st</sup> tertile         | 44 (6.9)             | 596 (93.1)              | 1.48 (0.75–2.92)        | 0.26    |                   |
| High-risk form of PCa                               |                      |                         |                         |         |                   |
| 3 <sup>rd</sup> tertile (highest)                   | 14 (21.2)            | 52 (78.8)               | Reference               | N/A     |                   |
| 2 <sup>nd</sup> and 1 <sup>st</sup> tertile         | 59 (31.1)            | 131 (68.9)              | 1.58 (0.77–3.23)        | 0.21    |                   |

<sup>a</sup>Adjusted for BMI, smoking status, pack-year, D'Amico risk groups, and and primary treatment

<sup>b</sup>Adjusted for age, smoking status, pack-year, D'Amico risk groups, and and primary treatment

<sup>c</sup>Adjusted for age, BMI, D'Amico risk groups, and and primary treatment

<sup>d</sup>Adjusted for age, BMI, smoking status, pack-year, and primary treatment

Abbreviations: mtDNAcn, mitochondrial DNA copy number; BMI, body mass index; HR, hazard ratio; CI, confidence interval.
